# Supplementary material
Source: publisher site journal article supplement (https://www.dovepress.com/article/393058)
Supplement: Supplementary file 1 [file get_supplementary_file.php]

Supplementary Material

**Supplementary Table 1.** Relevant parameters of the CT equipment used

**Supplementary Table 2.** Different filter and radiomic features

**Supplementary Table 3.** Characteristic baseline of the training and testing samples

**Supplementary Table 4.** Consistency test of radiomic features

**Supplementary Table 5.** Feature weighting coefficients for five models and calculation of radiomics score for model 3

**Supplementary Table 6.** The denglong test compares the AUCs of the five models on the test set

**Supplementary Figure 1.** Selection of 3D radiomic features(a,b) and 2D radiomic features(c,d) by LASSO algorithm.

**Supplementary Figure 2.** C-radscore plot of model3 in the training set(a) and test set(b).

**Supplementary Table 1.** Relevant parameters of the CT equipment used

|  | **SOMATOM Definition Flash** | **GE Revolution HD CT** |
| --- | --- | --- |
| CT tube voltage | 120 kVp | 120 kVp |
| CT tube current | 150mAs | 180mAs |
| CT rotation time | 0.5s | 0.6s |
| Pitch | 1 | 0.984 |
| Layer thickness | 5mm | 5mm |
| Reconstruction thickness | 1mm | 1.25mm |
| Reconstruction pitch | 1mm | 1.25mm |
| Reconstruction algorithm | SAFIRE, Level 3 | ASIR-V, Level 4 |
| Contrast agent | Ioversol | Ioversol |
| Contrast agent concentration | 350 mgI/mL | 350 mgI/mL |
| Contrast agent dosage | 1.2-1.5mL/kg | 1.2-1.5mL/kg |
| Contrast agent infused rate | 3.5ml/s | 3.5ml/s |
| Venous phase interval time | 55s | 55s |
| Image matrix | 512*512 | 512*512 |

**Supplementary Table 2.** Different filter and radiomic features

| **Filter** | **Firstorder** | **GLCM** | **GLSZM** |
| --- | --- | --- | --- |
| Original  wavelet-LLH  wavelet-LHL  wavelet-LHH  wavelet-HLL  wavelet-HLH  wavelet-HHL  wavelet-HHH  wavelet-LLL | '10Percentile',  '90Percentile',  'Energy',  'Entropy',  'InterquartileRange',  'Kurtosis',  'Maximum',  'MeanAbsoluteDeviation',  'Mean',  'Median',  'Minimum',  'Range',  'RobustMeanAbsoluteDeviation',  'RootMeanSquared',  'Skewness',  'TotalEnergy',  'Uniformity',  'Variance' | | 'Autocorrelation', | | --- | | 'ClusterProminence', | | 'ClusterShade', | | 'ClusterTendency', | | 'Contrast', | | 'Correlation', | | 'DifferenceAverage', | | 'DifferenceEntropy', | | 'DifferenceVariance', | | 'Id', | | 'Idm', | | 'Idmn', | | 'Idn', | | 'Imc1', | | 'Imc2', | | 'InverseVariance', | | 'JointAverage', | | 'JointEnergy', | | 'JointEntropy', | | 'MCC', | | 'MaximumProbability | | 'SumAverage', | | 'SumEntropy', | | 'SumSquares', | | 'GrayLevelNonUniformityNormalized',  'GrayLevelVariance',  'HighGrayLevelZoneEmphasis',  'LargeAreaEmphasis',  'LargeAreaHighGrayLevelEmphasis',  'LargeAreaLowGrayLevelEmphasis',  'LowGrayLevelZoneEmphasis',  'SizeZoneNonUniformity',  'SizeZoneNonUniformityNormalized',  'SmallAreaEmphasis',  'SmallAreaHighGrayLevelEmphasis',  'SmallAreaLowGrayLevelEmphasis',  'ZoneEntropy',  'ZonePercentage',  'ZoneVariance' |
| **GLRLM** | **NGTDM** | **GLDM** | **SHAPE** |
| 'GrayLevelNonUniformity',  'GrayLevelNonUnifor'mityNormalized',  'GrayLevelVariance',  'HighGrayLevelRunEmphasis',  'LongRunEmphasis',  'LongRunHighGrayLevelEmphasis',  'LongRunLowGrayLevelEmphasis',  'LowGrayLevelRunEmphasis',  'RunEntropy',  'RunLengthNonUniformity',  'RunLengthNonUnifor'mityNormalized',  'RunPercentage',  'RunVariance',  'ShortRunEmphasis',  'ShortRunHighGrayLevelEmphasis',  'ShortRunLowGrayLevelEmphasis', | 'Busyness',  'Coarseness',  'Complexity',  'Contrast',  'Strength' | 'DependenceEntropy',  'DependenceNonUniformity',  'DependenceNonUniformityNormalized',  'DependenceVariance',  'GrayLevelNonUniformity',  'GrayLevelVariance',  'HighGrayLevelEmphasis',  'LargeDependenceEmphasis',  'LargeDependenceHighGrayLevelEmphasis',  'LargeDependenceLowGrayLevelEmphasis',  'LowGrayLevelEmphasis',  'SmallDependenceEmphasis',  'SmallDependenceHighGrayLevelEmphasis',  'SmallDependenceLowGrayLevelEmphasis', | 'Elongation',  'Flatness',  'LeastAxisLength',  'MajorAxisLength',  'Maximum2DDiameterColumn',  'Maximum2DDiameterRow',  'Maximum2DDiameterSlice',  'Maximum3DDiameter',  'MeshVolume',  'MinorAxisLength',  'Sphericity',  'SurfaceArea',  'SurfaceVolumeRatio  VoxelVolume', |

GLCM: Gray level co-occurrence matrix, GLSZM: Gray level size zone matrix, GLRLM: Gray Level Run Length Matrix, NGTDM: Neighbouring Gray Tone Difference Matrix, GLDM: Gray level dependence matrix. All feature classes, with the exception of shape can be calculated on either the original image and/or a derived image, obtained by applying one of several filters(https://pyradiomics.readthedocs.io/en/latest/features.html#).

**Supplementary Table 3.** Characteristic baseline of the training and testing samples

| Variable | training set(n=175) | test set(n=78) | P-value |
| --- | --- | --- | --- |
| DM |  |  |  |
| no | 88(50.29%) | 42(53.85%) | 0.601 |
| yes | 87(49.71%) | 36(46.15%) |  |
| sex |  |  |  |
| Male | 88(50.29%) | 40(51.28%) | 0.884 |
| Female | 87(49.71%) | 38(48.72%) |  |
| smoking |  |  |  |
| no | 138(78.86%) | 60(76.92%) | 0.731 |
| yes | 37(21.14%) | 18(23.08%) |  |
| Tumor location1 |  |  |  |
| Right upper lobe | 63(36.00%) | 27(34.62%) | 0.865 |
| Right middle lobe | 14(8.00%) | 9(11.54%) |  |
| Right lower lobe | 26(14.86%) | 9(11.54%) |  |
| Left upper lobe | 44(25.14%) | 21(26.92%) |  |
| Left lower lobe | 28(16.00%) | 12(15.38%) |  |
| Tumor location2 |  |  |  |
| Peripheral | 138(78.86%) | 59(75.64%) | 0.569 |
| Central | 37(21.14%) | 19(24.36%) |  |
| lobulation |  |  |  |
| no | 78(44.57%) | 39(50.00%) | 0.424 |
| yes | 97(55.43%) | 39(50.00%) |  |
| burr |  |  |  |
| no | 116(66.29%) | 55(70.51%) | 0.507 |
| yes | 59(33.71%) | 23(29.49%) |  |
| pleural_indentation* |  |  |  |
| no | 5(2.86%) | 4(5.13%) | 0.594 |
| yes | 170(97.14%) | 74(94.87%) |  |
| cavity |  |  |  |
| no | 143(81.71%) | 74(94.87%) | 0.006 |
| yes | 32(18.29%) | 4(5.13%) |  |
| T stage |  |  |  |
| T1 | 50(28.57 %) | 23(29.49 %) | 0.451 |
| T2 | 78(44.57 %) | 39(50.00 %) |  |
| T3 | 26(14.86 %) | 11(14.10 %) |  |
| T4 | 21(12.00 %) | 5(6.41 %) |  |
| N stage |  |  |  |
| N0 | 83(47.43 %) | 46(58.97 %) | 0.249 |
| N1 | 21(12.00 %) | 6(7.69 %) |  |
| N2 | 52(29.71 %) | 16(20.51 %) |  |
| N3 | 19(10.86 %) | 10(12.82 %) |  |
| age | 64.00(57.00, 70.00) | 63.00(56.00, 69.00) | 0.47 |
| CEA | 5.59(2.15, 22.06) | 4.60(1.79, 30.20) | 0.935 |
| CA199 | 15.94(9.99, 28.56) | 17.01(9.74, 29.44) | 0.99 |
| T-max | 36.00(26.20, 49.80) | 32.00(23.00, 46.05) | 0.076 |
| N-max | 10.00(7.00, 13.00) | 8.00(7.00, 12.00) | 0.143 |

DM: distant metastasis, T-max: Maximum diameter of primary tumor, N-max: short diameter of the largest lymph node, * Variable use corrected chi-square test

**Supplementary Table 4.** Consistency test of radiomic features

|  | 3D Radiomics features | 2D Radiomics features |
| --- | --- | --- |
| Average of ICC values | 0.911997581 | 0.796753611 |
| Median of ICC values | 0.94017852 | 0.855152918 |
| Maximum value of ICC values | 0.949810243 | 0.949407797 |
| Minimum value of ICC values | 0.418250546 | 0.211935404 |
| number (ICC values ≥ 0.9) | 696 | 242 |
| number (0.75 ≤ ICC values < 0.9) | 119 | 378 |
| number (0.5 ≤ ICC values < 0.75) | 28 | 186 |
| number (ICC values < 0.5) | 8 | 45 |
| number (ICC values ≥ 0.75) | 815 (95.8%) | 620 (72.9%) |

**Supplementary Table5.** Feature weighting coefficients for five models and calculation of radiomics score for model 3

| **Model** | **Intercept/Feature Name (short name)** | **Coefficient** |
| --- | --- | --- |
| **Model1** | **Intercept=-0.0122** |  |
|  | original_gldm_DependenceEntropy(X1) | 0.4862 |
|  | original_glszm_ZoneEntropy(X2) | 0.1494 |
|  | Wavelet-LLL_glszm_ZoneEntropy(X3) | 0.2775 |
| **Model2** | **Intercept=-0.0164** |  |
|  | original_shape_Elongation(Y1) | -0.3657 |
|  | original_gldm_DependenceEntropy(Y2) | 0.6944 |
|  | original_glrlm_RunEntropy(Y3) | -0.1226 |
|  | wavelet-LHL_glcm_Contrast(Y4) | -0.3242 |
|  | wavelet-LHL_glrlm_RunVariance(Y5) | 0.4005 |
|  | wavelet-LHH_glcm_Imc2(Y6) | -0.2587 |
| **Model3** | **Intercept=-0.0216** |  |
|  | original_gldm_DependenceEntropy(X1) | 0.5689 |
|  | original_glszm_ZoneEntropy(X2) | 0.0587 |
|  | Wavelet-LLL_glszm_ZoneEntropy(X3) | 0.0189 |
|  | original_shape_Elongation(Y1) | -0.3718 |
|  | original_gldm_DependenceEntropy(Y2) | 0.4116 |
|  | original_glrlm_RunEntropy(Y3) | -0.3483 |
|  | wavelet-LHL_glcm_Contrast(Y4) | -0.2579 |
|  | wavelet-LHL_glrlm_RunVariance(Y5) | 0.4393 |
|  | wavelet-LHH_glcm_Imc2(Y6) | -0.2517 |
| **Model4** | **Intercept=-4.2537** |  |
|  | N_stage | 0.904 |
|  | CEA | 0.0288 |
|  | age | 0.0454 |
| **Model5** | **Intercept=-3.3215** |  |
|  | N_stage | 0.8242 |
|  | CEA | 0.025 |
|  | age | 0.0327 |
|  | c-radscore | 0.7929 |
| c-radscore=-0.0216+X1×0.5689+X2×0.0587+X3×0.0189-Y1×0.3718+Y2×0.4116-Y3×0.3483-Y4×0.2579+Y5×0.4393-Y6×0.2517 | | |

**Supplementary Table 6.** The denglong test compares the AUCs of the five models on the test set

| Model | Model 1 | Model 2 | Model 3 | Model 4 | Model 5 |
| --- | --- | --- | --- | --- | --- |
| Model 1 | - | 0.225 | 0.104 | 0.112 | 0.001 |
| Model 2 | - | - | 0.743 | 0.388 | 0.008 |
| Model 3 | - | - | - | 0.445 | 0.013 |
| Model 4 | - | - | - | - | 0.045 |
| Model 5 | - | - | - | - | - |

P values (delong test) are the results of comparing the AUCs of the five models on the test set, P values<0.05/10 indicated statistical significance.


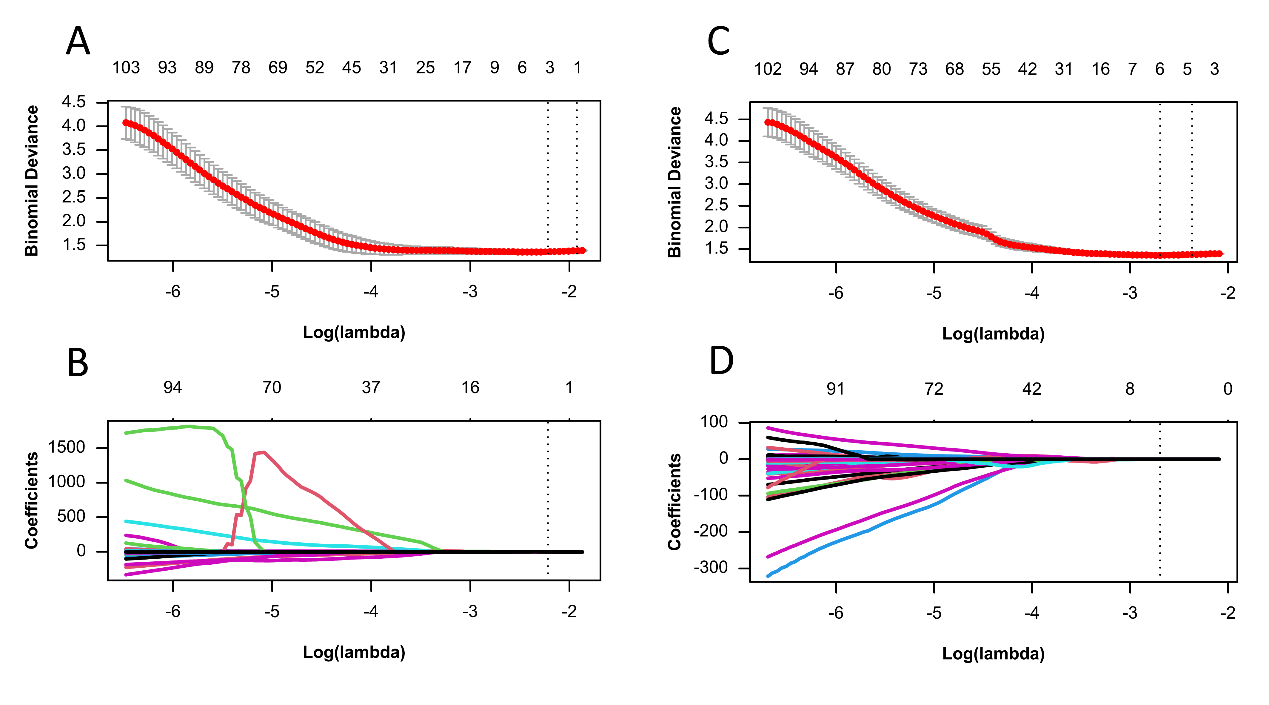


**Supplementary Figure 1.** Selection of 3D radiomic features(a,b) and 2D radiomic features(c,d) by LASSO algorithm.


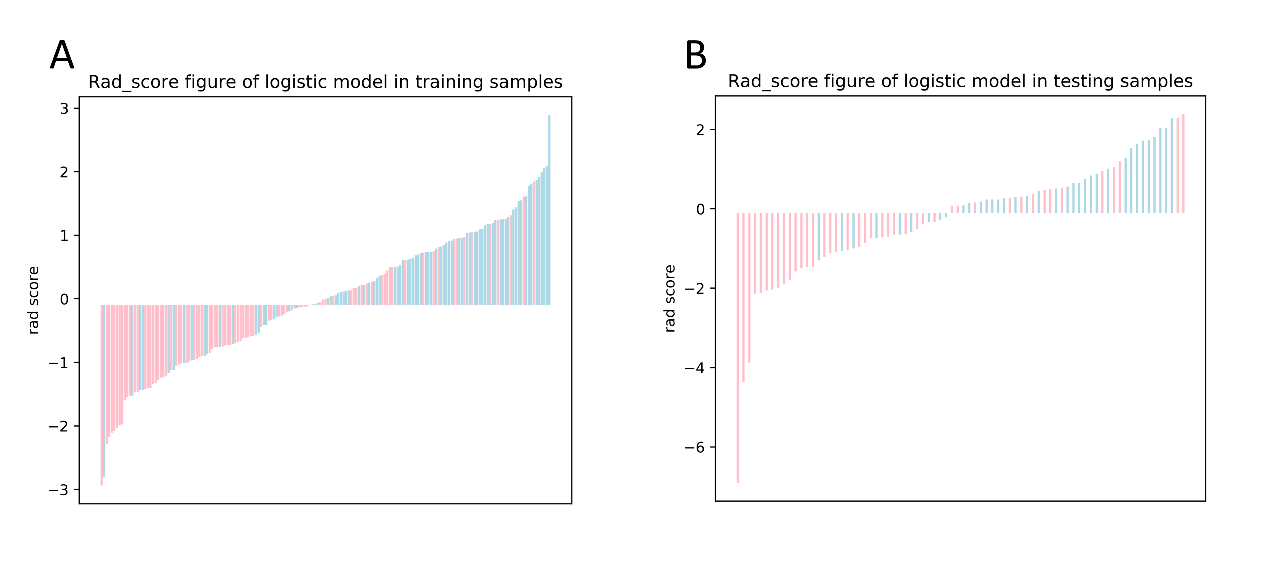


**Supplementary Figure 2.** C-radscore plot of model3 in the training set(a) and test set(b).
